# Supplementary material for: Homologous Recombination Deficiency (HRD) and BRCA 1/2 Gene Mutation for Predicting the Effect of Platinum-Based Neoadjuvant Chemotherapy of Early-Stage Triple-Negative Breast Cancer (TNBC): A Systematic Review and Meta-Analysis
Source: J Pers Med. 2022 Feb 21;12(2):323. doi: 10.3390/jpm12020323 (PMC8876589; doi:10.3390/jpm12020323)
Supplement: Supplementary file 1 [file jpm-12-00323-s001.zip › jpm-1557398-supplementary.pdf]

Supplemental Table S1. The definitions of pCR in the included studies.

| Author                                                            | Study       | Year          | the definition of pCR                                                                                                                                                        |
|-------------------------------------------------------------------|-------------|---------------|------------------------------------------------------------------------------------------------------------------------------------------------------------------------------|
| Fasching et al. <sup>(19)</sup>                                   | GeparPLA    | 2020          | pCR was defined as no residual invasive tumor in breast and in axillary lymph nodes (ypT0/is ypN0).                                                                          |
| Mayer et al. <sup>(20)</sup>                                      | TBCRC030    | 2020          | No detailed description.                                                                                                                                                     |
| Yuan et al. <sup>(21)</sup>                                       | NCT01525966 | 2020          | pCR was defined as no residual invasive breast cancer with or without DCIS in the breast and axilla (ypT0/TisN0).                                                            |
| Sharma et al. <sup>(22)</sup>                                     | NeoSTOP     | 2020          | pCR was defined as no residual invasive breast cancer with or without DCIS in the breast and axilla (ypT0/TisN0).                                                            |
| Fontaine et al. <sup>(23)</sup>                                   | BSMO        | 2019          | pCR was defined as no residual invasive tumor in breast and in axillary lymph nodes (ypT0/is ypN0).                                                                          |
| Hahnen et al. <sup>(15)</sup> ,<br>Loibl.S et al. <sup>(25)</sup> | GeparSixto  | 2017,<br>2018 | pCR was defined as either no invasive residuals in breast and lymph nodes (ypT0/is ypN0) or no invasive and no non-invasive residuals in breast and lymph nodes (ypT0 ypN0). |
| Loibl et al. <sup>(26)</sup> ,<br>Telli et al. <sup>(27)</sup>    | BrighTNess  | 2018          | pCR was defined as no residual invasive disease on evaluation of the resected breast specimen and resected lymph nodes (ie, ypT0/is ypN0).                                   |
| Sella et al. <sup>(32)</sup>                                      |             | 2018          | pCR was defined as no residual invasive disease (with or without DICS) in the breast and no any tumor deposit > 0.2 mm in sampled axillary nodes (ypT0/isN0).                |
| Sharma et al. <sup>(28)</sup>                                     | PROGECT     | 2017          | PCR was defined as no residual invasive disease with or without DICS in the breast and axilla (ypT0/isN0).                                                                   |
| Connolly et al. <sup>(29)</sup>                                   | TBCRC 008   | 2016          | PCR was defined as no invasive cancer in breast/axilla.                                                                                                                      |
| Telli et al. <sup>(30)</sup>                                      | PrECOG 0105 | 2015          | PCR was defined as no invasive carcinoma in the breast and axillary lymph nodes.                                                                                             |
| Kaklamani et al. <sup>(31)</sup>                                  | NCT01372579 | 2015          | pCR was defined as no histologic evidence of invasive tumor cells in the surgical breast specimen and axillary lymph nodes.                                                  |
| Silver et al. <sup>(23)</sup>                                     |             | 2010          | PCR was defined as a score of 5 according to the Miller-Payne scoring system.                                                                                                |

**Abbreviations:** pCR: pathological complete response CR: DCIS: ductal carcinoma in situ.
